# Supplementary material for: Morpho-biochemical characterization and molecular marker based genetic diversity of pearl millet (Pennisetum glaucum (L.) R. Br.)
Source: PeerJ. 2023 Jun 5;11:e15403. doi: 10.7717/peerj.15403 (PMC10249620; doi:10.7717/peerj.15403)
Supplement: Data S1 [file peerj-11-15403-s001.xlsx]

## Sheet: Morpho-biochemical data
Genotype	R1	R2	R1	R2	R1	R2	R1	R2	R1	R2	R1	R2	R1	R2	R1	R2	R1	R2	R1	R2	R1	R2	R1	R2	R1	R2	R1	R2	R1	R2	R1	R2	R1	R2	R1	R2	R1	R2
Traits	DTFF	DTFF	PH	PH	HD	HD	Pl	PL	PTpP	PTpP	GYP	GYP	DTM	DTM	TGW	TGW	Protein	Protein	Lipid	Lipid	Fe	Fe	Zn	Zn	Mn	Mn	Ca	Ca	Cu	Cu	K	K	P	P	Phytate	Phytate	Phenolics	Phenolics
1	75	72	111.8	121.4	1.95	1.85	27.2	22.6	4.9	4.9	45.2	33.4	86	88	7.47	7.32	14.007	11.67	6.46	6.95	40.5	37.12	37.29	41.21	16.95	17.25	195	225	17.303	18.966	5310	4940	3473.1	3182.9	284.3	277.5	44.5068	54.39
2	55	58	131.1	140.8	1.42	1.48	25.4	26.6	4.5	4.9	11.9	19.8	87	85	5.32	6.1	15.3202	16.11	7	6.84	51.8	46.15	46.41	43.54	6.8	7.59	225	184	17.5231	17.0607	1620	1980	2979	3325.55	333.1	281.1	60.9336	52.99
3	47	43	127.2	136.7	1.3	1.09	23.5	21.6	4.7	4.3	16.4	22.4	88	90	5.87	6	15.9767	14.21	5.52	5.59	40.9	44.59	50.4	55.85	13.85	14.95	219	246	13.7029	13.0752	4860	4480	2951	2644.55	203.3	207	69.498	60.36
4	74	70	151.9	144.1	1.66	1.47	28.9	26.4	4	4.5	21.6	18.9	86	90	7.62	7.33	10.5053	11.21	5.17	5.04	66.2	70.2	34.84	37.48	15.3	16.21	210	121	13.0028	12.943	5000	5214	3257.45	3597.95	279	296.6	65.286	69.74
5	39	44	152.8	159.9	1.32	1.5	20.9	20.8	6.2	6.1	37.8	30.5	87	84	7.67	7.72	15.1013	15.94	5.77	6.03	62.3	59.84	28.42	30.56	13.55	11.15	188	188	6.22	6.19	5400	4990	3041.8	3507.15	311.9	313.1	64.1628	60.33
6	52	58	157	169.5	1.26	1.14	16.8	17.8	6	6.1	14.9	20.7	84	81	7.1	7.07	12.9127	13.07	2.94	3.13	40.2	35.92	31.1	27.58	8.8	8.75	127	160	6.86307	6.69888	4180	4380	2996.4	2712.65	208.2	194.8	60.0912	49.38
7	41	46	146.2	154.8	1.63	1.49	22.1	21.8	6.5	7.1	47.6	34.1	84	81	7.33	7.24	14.007	15.44	7.31	6.22	48.9	53.39	49.7	54.09	12.45	12.85	211	236	8.50063	7.40597	4420	4430	3178	3291.5	258	237.7	58.1256	66.54
8	42	45	147.4	154.6	1.69	1.58	25.7	28.9	4.2	4.6	20.1	26.9	83	80	8.44	8.46	14.4447	13.48	4.98	5.11	79.95	74.8	44.94	49.96	16.15	15.98	184	203	11.588	10.2431	6070	5210	3518.5	3824.95	238.7	233.5	74.412	64.28
9	43	45	115.5	122.1	1.6	2.06	18.4	18.7	6.6	7.2	27.6	20.8	85	82	5.62	5.92	14.2259	16.41	2.2	3.23	55.1	50.85	40.88	44.85	13.45	14.15	176	189	5.1941	6.22341	4540	4750	3257.45	2985.05	304.1	291.6	75.9564	61.39
10	69	72	157.6	144.9	1.03	1.02	18.5	17.4	3.8	3.2	25.8	30.9	86	82	6.07	6.24	16.1956	15.22	7.15	6.12	44.1	48.22	47.32	50.26	10.1	10.68	204	233	18.9828	19.6036	5760	6270	3030.45	3384.45	254	247.9	79.326	66.97
11	67	71	111.3	121.3	1.05	1.19	22.2	20.1	8.1	6.6	23	30.7	82	79	5.55	5.56	14.007	14.78	5.15	5.29	47.2	50	33.16	30.3	10.9	10.19	166	182	12.5255	11.6919	4930	4740	3155.3	2826.15	214.3	208.9	67.5324	61.28
12	67	60	156.8	144.8	1.74	1.65	33.6	30.3	5.3	5.5	52.8	40.1	86	90	8.06	7.96	18.8219	19.55	2.87	3.17	40.5	44.23	30.8	36.17	15.96	16.7	234	215	9.20455	7.00483	4840	5510	3098.55	3354.7	314.7	288.3	60.7932	55.92
13	54	58	157.9	164.1	1.71	1.41	33.9	27.8	6	4.4	55.6	42.3	87	87	8.74	8.73	13.5693	14.51	2.89	3.05	39.5	34.4	33.79	38.66	11	14.65	90	110	6.61955	7.74927	4100	4970	3089.95	3359.6	376.7	336.8	74.2716	66.39
14	70	72	104	116.2	1.15	1.48	22.1	25.4	3	4	20	29.4	84	85	10.42	10.48	14.8824	15.09	4.99	5.14	51.95	46.2	34.16	31.14	10.5	11.45	228	216	8.03324	9.12026	4360	4470	2394.85	2882.9	256	250.2	45.9108	44.2
15	53	54	119.9	131	1.66	1.63	21.2	22.8	6.1	5.7	44.4	51.1	86	84	7.21	7.33	19.9162	20.21	2.66	2.98	72.4	66.89	36.66	33.6	17.4	17.15	244	214	7.21367	9.14882	5040	5420	2746.7	2803.45	291.7	283.8	70.4808	79.84
16	43	41	150.3	141.7	1.65	1.74	28.1	29.1	6.4	6.8	16.1	22.8	88	90	6.59	6.55	11.1618	12.47	6.58	6.75	28.5	34.66	33.72	37.38	9.9	11.5	189	179	17.3452	16.1885	4990	5250	3019.1	2678.6	223	216.1	64.1628	70.12
17	68	66	139.6	125.5	2.07	2.01	24.8	30.3	3.3	2	14.7	22.9	84	86	7.77	7.72	10.5053	10.96	5.94	5.51	50	54.48	39.67	34.71	12.7	13.7	181	171	10.7646	8.71922	3600	4990	2996.4	3416.35	207.3	198.8	62.478	49.59
18	60	59	114.9	125	1.03	1.41	21.3	20.7	6.2	6.7	19.7	24.1	85	88	5.47	6.35	17.5087	16.22	4.39	4.61	64.4	69.36	37.22	31.88	16.85	17.55	229	232	10.4372	9.2349	3220	4270	2758.05	3370.95	265.6	247.9	43.6644	51.38
19	63	60	147.4	138	1.38	1.52	34.1	30.9	6.5	6.6	23.6	26.1	85	88	6.74	6.28	14.6636	14.24	7.16	6.74	58.23	60.66	35.47	45.28	18.2	17.05	191	194	10.7814	9.28576	4680	4940	2939.65	3281.7	196.8	228.4	61.2144	52.22
20	77	72	143.2	131.2	1.86	2.01	23.8	22.1	4.1	4.1	22.8	18.1	85	89	5.7	6.77	12.2561	11.41	5.76	5.91	48.6	42.3	34.58	40.29	17.5	16.9	187	183	5.76669	4.95593	4710	4860	3007.75	3366.05	305.1	299.7	71.7444	64.31
21	49	46	117.8	109.4	1.11	1.33	15.9	18.8	3.7	3.5	12.3	22.7	84	86	4.4	5.45	11.3807	11.99	2.91	3.31	44.55	50.06	42.12	47.58	14.6	15.75	166	171	13.841	13.3508	4880	4820	3461.75	3575.25	258.1	266.3	75.3948	59.02
22	49	52	126.3	139	1.53	1.88	16.4	14.7	5.8	6	33.4	24.5	89	85	6.39	5.94	11.1618	12.32	5.74	5.84	80.23	74	41.02	47.11	12.6	13.45	201	224	13.5163	13.0491	5470	4960	3064.5	3155.3	204.6	208.2	56.16	65.58
23	79	75	122	135.8	1.61	1.68	16.5	15.5	3.9	3.4	23.2	27.8	86	90	7.9	7.62	11.3807	12.28	5.34	5.39	60.2	53.6	30.38	36.36	9.7	9.4	190	192	5.50283	6.42575	4040	4720	3155.3	3393.05	426.6	413.4	68.9364	58.85
24	47	45	169.6	154.7	1.4	1.4	22.4	22.1	4.7	4.7	51.6	44.4	86	88	5.87	4.52	12.6938	13.32	5.6	5.51	32.5	37.85	30.99	36.68	11.55	11.69	198	213	6.7221	6.33362	4510	4880	2712.65	2894.25	396.2	375.8	66.5496	56.39
25	72	76	151	166.1	1.7	1.69	22.7	24.1	4.4	4.2	32.8	39.7	84	80	6.35	6.06	16.1956	17.49	6.17	6.22	51.7	68.1	44.1	36.94	15.5	17.2	216	198	5.6247	5.3155	5000	6120	3552.55	2621.85	256.3	251.6	49.5612	59.33
26	72	78	106	119.1	1.18	1.22	25.6	20.7	1.9	3.4	19.7	28.4	88	84	7.74	7.71	14.007	14.77	5.92	5.85	56.3	50.7	42.26	37.86	11	12.2	201	182	5.18506	4.98	3810	3950	3053.15	2826.15	241.6	236.3	66.1284	54.19
27	69	69	143	156.1	1.65	1.86	29.6	26.5	3.3	3.9	32.4	40.9	85	85	8.09	7.91	13.5693	12.65	6.17	6.03	47.2	41.21	34.72	29.96	16.4	14.05	260	241	5.26773	4.66	5810	6160	3082.3	2814.8	252.5	233.9	50.6844	60.22
28	74	71	167.5	152	2.1	2.2	23.3	23.7	3.8	3.2	40.6	51.7	86	88	8.34	8.38	12.6938	12.32	4.2	4.29	41.3	49.67	39.76	44.78	14.1	12.55	244	245	5.42965	6.16996	5400	4880	3405	3006.2	310.3	296.9	62.0568	54.87
29	47	50	175.1	188.7	1.63	1.45	25.4	26.7	3.7	3.4	39.8	44.7	85	84	7.86	7.94	12.6938	13.02	6.48	6.44	36.1	42.15	36.05	30.66	15.15	13.5	154	141	9.77061	7.69024	3750	4430	3098.55	2701.3	321.5	293.9	60.9336	52.37
30	51	49	169.5	154.7	1.79	2.14	24.8	29.7	3.4	2.3	33.8	42.8	84	86	7.36	6.99	14.8824	15.06	4.98	5.09	45.2	41.9	36.95	30.01	15.8	14.05	246	242	10.3833	10.7035	5510	4870	3121.25	2928.3	353.2	322.2	58.266	64.28
31	37	40	133.2	148	1.84	1.97	21.8	19.8	3.7	4.3	25.8	30.9	87	84	6.59	6.67	17.071	16.89	3.38	3.42	39.3	47.88	33.37	38.75	13.95	12	256	256	6.45212	7.57424	5320	4820	3007.75	2973.7	282.9	273.8	53.352	61.59
32	63	61	168.6	180	1.39	1.55	26.7	30.4	4.1	3.7	22	29.1	86	88	7.18	7.53	9.62981	10.15	2.78	2.98	47.63	54.29	38.56	30.2	13.5	14.19	237	259	22.8586	22.0205	4940	5200	3121.25	3087.2	258.4	243.7	63.3204	72.51
33	69	69	150.6	164.1	1.7	1.08	18.1	23.1	3.4	4	37.2	30.1	86	86	9.42	9.35	13.1316	13.69	2.96	3.05	53.3	60.58	48.16	53.96	16.85	15.25	217	204	10.5548	10.1859	4770	5250	3109.9	3155.3	206.7	201.3	64.584	71
34	45	45	204.4	190.4	1.25	1.08	24.7	21.4	5.6	5.8	37.2	30.3	83	84	6.87	5.7	15.3202	14.49	3.98	4.09	42.35	46.68	41.44	48.77	16.45	15.94	231	246	4.94041	4.89174	4830	4430	2939.65	3250.4	318.7	317	51.948	60.07
35	53	51	210.4	200.3	0.95	1.22	30.7	28.9	4.8	5	29.6	21.7	85	88	6.87	6.57	12.6938	13.39	2.86	2.96	49.8	44.12	50.66	42.98	15.05	14.2	179	203	14.5323	14.5302	4690	5120	3280.15	3234.75	257.1	261.3	44.7876	50.33
36	63	59	175.6	188.7	1.06	1.46	37.4	38.7	3.7	3.7	36.2	26.8	86	90	6.23	5.29	6.56578	9.95	3.54	3.59	48.4	44.59	35.84	44.26	15.95	15.21	207	225	14.5125	14.1177	4840	3650	3400.1	3166.65	406.2	396.7	70.7616	60.54
37	38	36	171	181.3	1.27	1.55	24.9	28.1	5.2	5.5	23.8	15.2	83	84	7.16	7.03	13.1316	14.48	3.19	3.14	69.7	75.95	46.81	40.04	13.1	14.86	221	228	9.30505	8.38243	4530	4570	3427.7	3359.6	290.4	283.6	58.1256	65.22
38	32	36	160.3	144.7	1.32	1.4	19.8	20.1	7.6	7.6	14.2	22.9	82	81	8.17	8.28	14.007	15.56	4.36	4.29	46.3	41.77	29.24	35.89	15.95	15.6	189	168	5.66632	5.72435	5040	4490	3302.85	3552.55	234.1	199.4	46.6128	53.39
39	36	33	160	149.2	1.53	1.59	21.2	20.7	5	6.5	42	33.6	85	87	6.42	6.69	13.5693	14.74	4.35	4.59	56.5	50.5	37.94	43.31	15.8	14.33	194	179	7.20234	6.21803	4750	5240	3302.85	3450.4	337.4	326.7	52.0884	56.68
40	43	41	152.4	141.3	1.83	1.69	30.3	27.5	4.3	4	19.9	24.7	88	89	7.12	7.56	12.475	11.11	4.59	4.48	68.8	73.63	57.75	53.2	15.85	14.26	212	188	11.7578	12.166	4170	5270	2451	2065.7	367	355.6	76.3776	70.01
41	45	41	149.2	156.3	1.02	1.41	17.7	15.9	6.1	6	18.7	22.4	86	88	5.73	6.35	14.4447	14.17	5.8	5.71	35.05	40.09	32.62	38.62	17.35	13.5	171	168	5.53	5.41	2960	2960	3098.55	3439.05	282.3	277.1	54.8964	59.37
42	35	38	150.2	159.4	1.27	1.04	33.2	29.1	3.3	3.2	20.1	26.7	86	85	6.73	6.88	15.539	16.61	5.52	5.69	41.48	36.15	46.2	40.02	16.9	13.7	180	209	13.0612	12.8621	5000	4800	2746.7	2973.7	289.5	267.3	45.7704	54.08
43	45	41	145.6	138.9	1.48	1.59	22.1	24.7	3.6	3	19.4	22.2	87	89	5.47	5.6	14.007	14.85	3.58	3.55	33.7	39.74	38.97	43.15	16.8	12.7	184	223	6.61507	6.18756	4710	5110	2939.65	3239.05	290.7	282.7	64.3032	57.82
44	51	49	156.8	166.4	1.64	1.33	25.3	24.7	6.4	6.6	23	26.3	85	87	8.03	8	9.62981	12.32	3.17	3.41	43.6	38.8	35.98	31.59	15.95	11.6	159	208	21.48	23.69	5250	5520	3200.7	3212.05	444.2	640.7	66.2688	59.57
45	55	59	133	141.7	1.51	1.59	19.9	18.8	3.4	4.1	20.4	28.7	89	85	7.01	6.79	12.2561	10.26	3.02	3.23	35.55	30.25	38.64	42.82	14.1	12.31	177	226	4.97245	5.30197	5740	6180	3302.85	3212.05	256.6	252.8	50.8248	57.71
46	51	48	156.2	149	1.59	1.56	19.3	18.4	7.4	6.7	37.6	30.1	87	90	9.01	8.97	14.007	13.33	2.98	2.95	39.83	44.88	36.59	40.6	14.9	16.45	210	230	5.66558	6.60881	5040	5740	3087.2	2916.95	256.3	243	56.3004	60.27
47	53	50	195	189.1	1.72	1.21	26.9	22.7	3.9	4.1	60.8	52.7	85	87	9.3	9.38	10.7241	11.24	3.79	4.03	35	39.58	34.77	40.11	13.8	17.85	110	142	5.43794	7.21341	5240	4980	3053.15	3632	262.5	258	40.2948	48.52
48	45	49	168.2	160.4	2.17	2.1	25.2	29.1	3	4	32.8	26.4	82	81	8.49	8.44	13.1316	11.21	2.98	3.12	54	60.5	35.68	39.93	14.15	12.54	153	201	6.40737	7.91164	4970	4860	2848.85	2939.65	313.5	289.1	67.8132	61.82
